# Supplementary material for: Vapor-phase transport synthesis of microfibrous-structured SS-fiber@ZSM-5 catalyst with improved selectivity and stability for methanol-to-propylene
Source: Royal Society of Chemistry journal article supplement (doi:10.1039/c7cy00283a), 2017-01-01
Supplement: c7cy00283a1.pdf [file c7cy00283a1.pdf]

## **Electronic Supplementary Information**

### **Vapor-phase transport synthesis of microfibrillar-structured SS- fiber@ZSM-5 catalyst with improved selectivity and stability for methanol- to-propylene**

Jia Ding, Songyu Fan, Pengjing Chen, Tao Deng, Ye Liu and Yong Lu\*

Shanghai Key Laboratory of Green Chemistry and Chemical Processes, School of Chemistry  
and Molecular Engineering, East China Normal University, Shanghai 200062, China

\* Corresponding authors. Tel. & Fax: (+86)21-62233424,

E-mail: ylu@chem.ecnu.edu.cn (Y.L.)

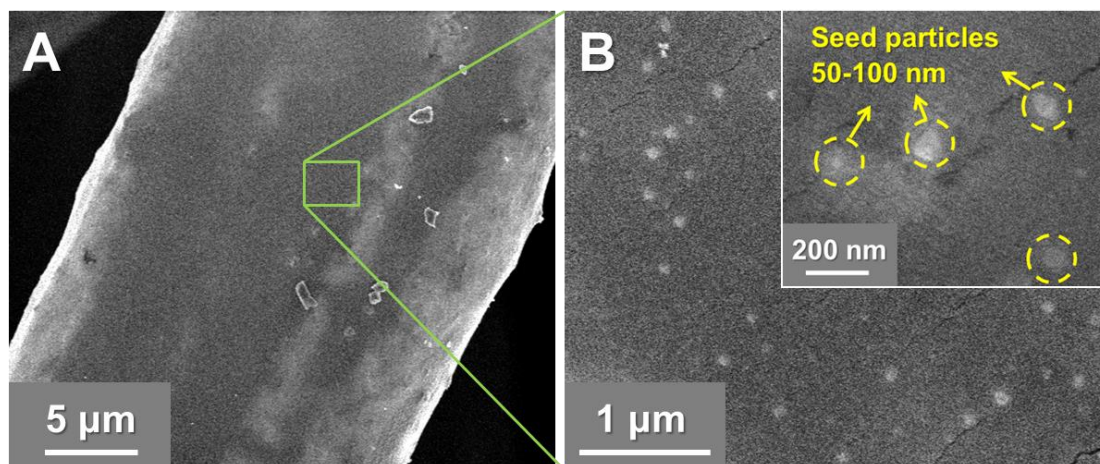

**Fig. S1** SEM images of dry gel coated SS-fiber.

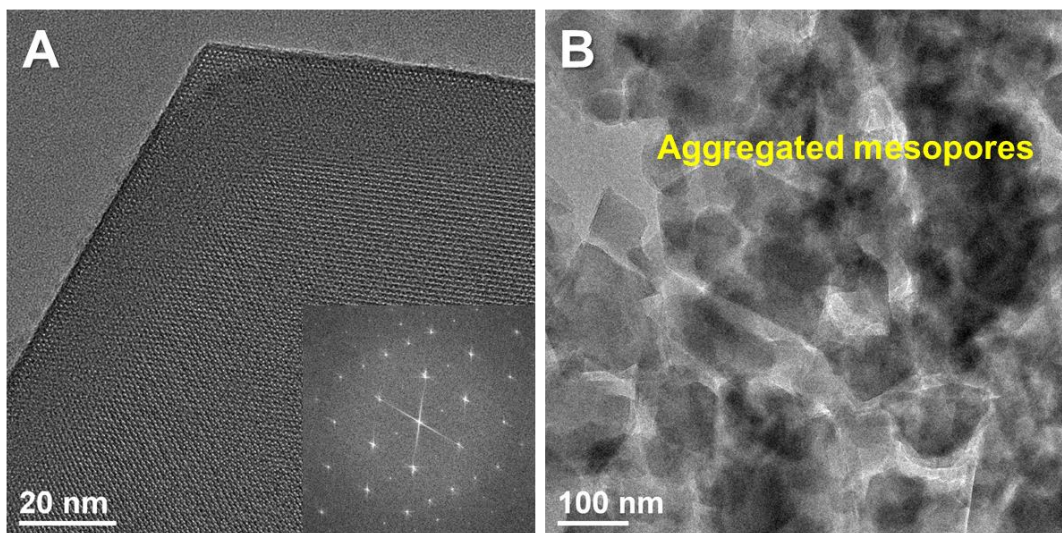

**Fig. S2** TEM images of the zeolite shell of representative EDA-200-5/120 core-shell composite.

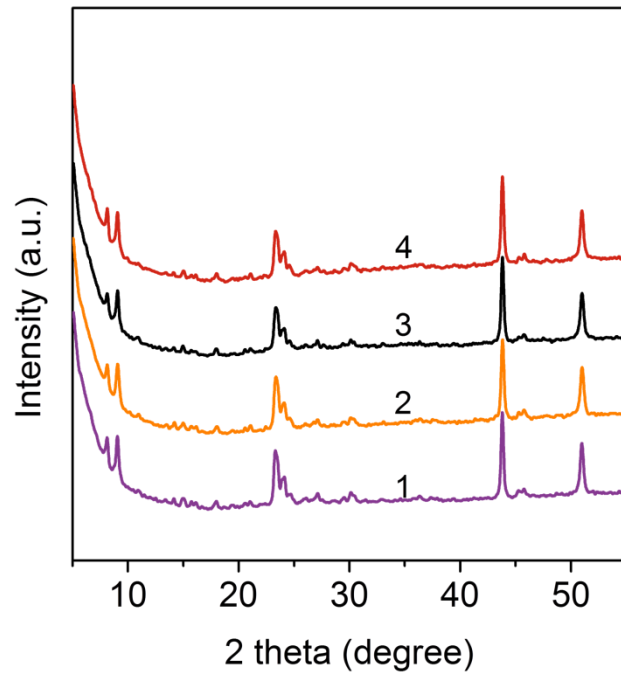

**Fig. S3** XRD patterns of SS-fiber@ZSM-5 composite synthesized with recycled EDA solution for different times.

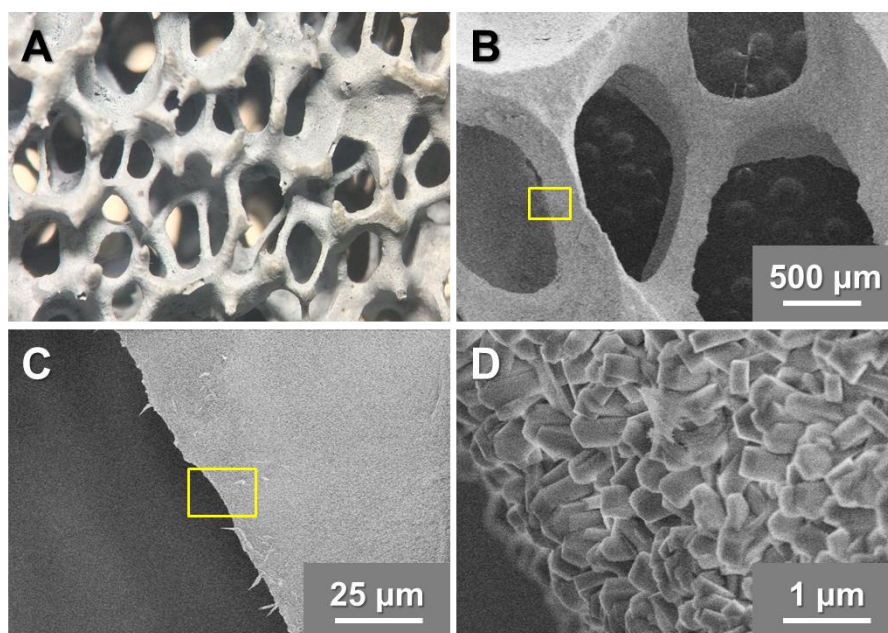

**Fig. S4** Photograph (A) of SiC-foam substrate and SEM images (B-D) of SiC-foam@ZSM-5 composite synthesized by VPT method.

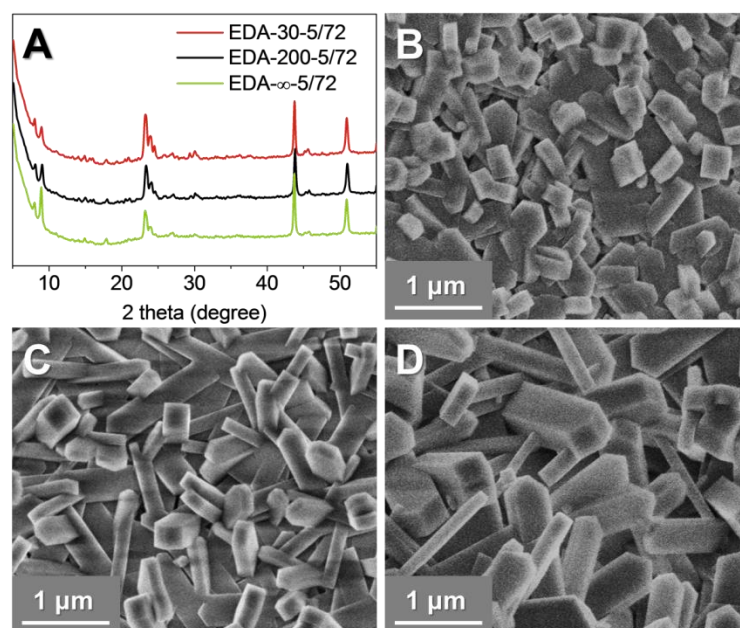

**Fig. S5** (A) XRD patterns and (B-D) SEM images of sample EDA- $x$ -5/3 synthesized with  $\text{SiO}_2/\text{Al}_2\text{O}_3$  molar ratio of (B)  $x = 30$ , (C)  $x = 200$  and (D)  $x = \infty$ .

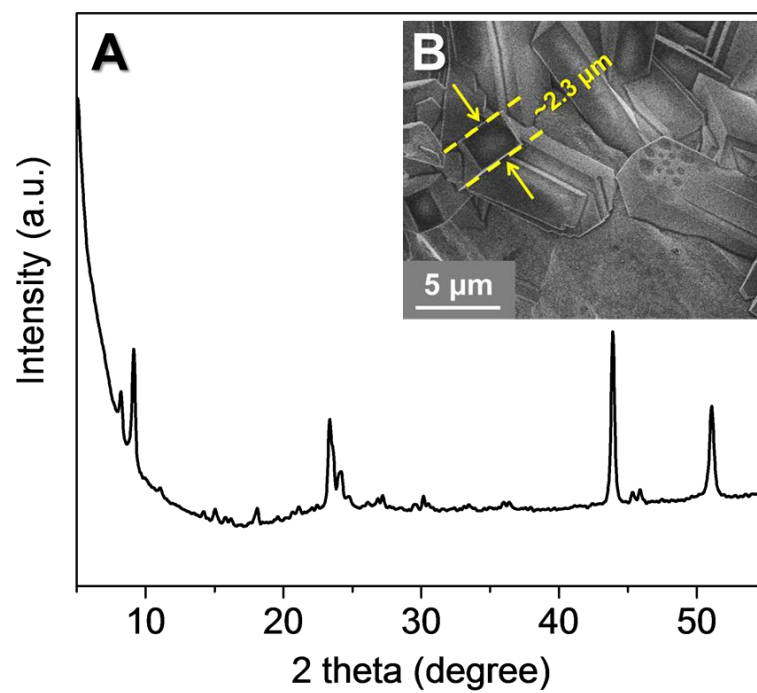

**Fig. S6** XRD pattern (A) and SEM image (B) of sample EDA-200-0.018T/72.



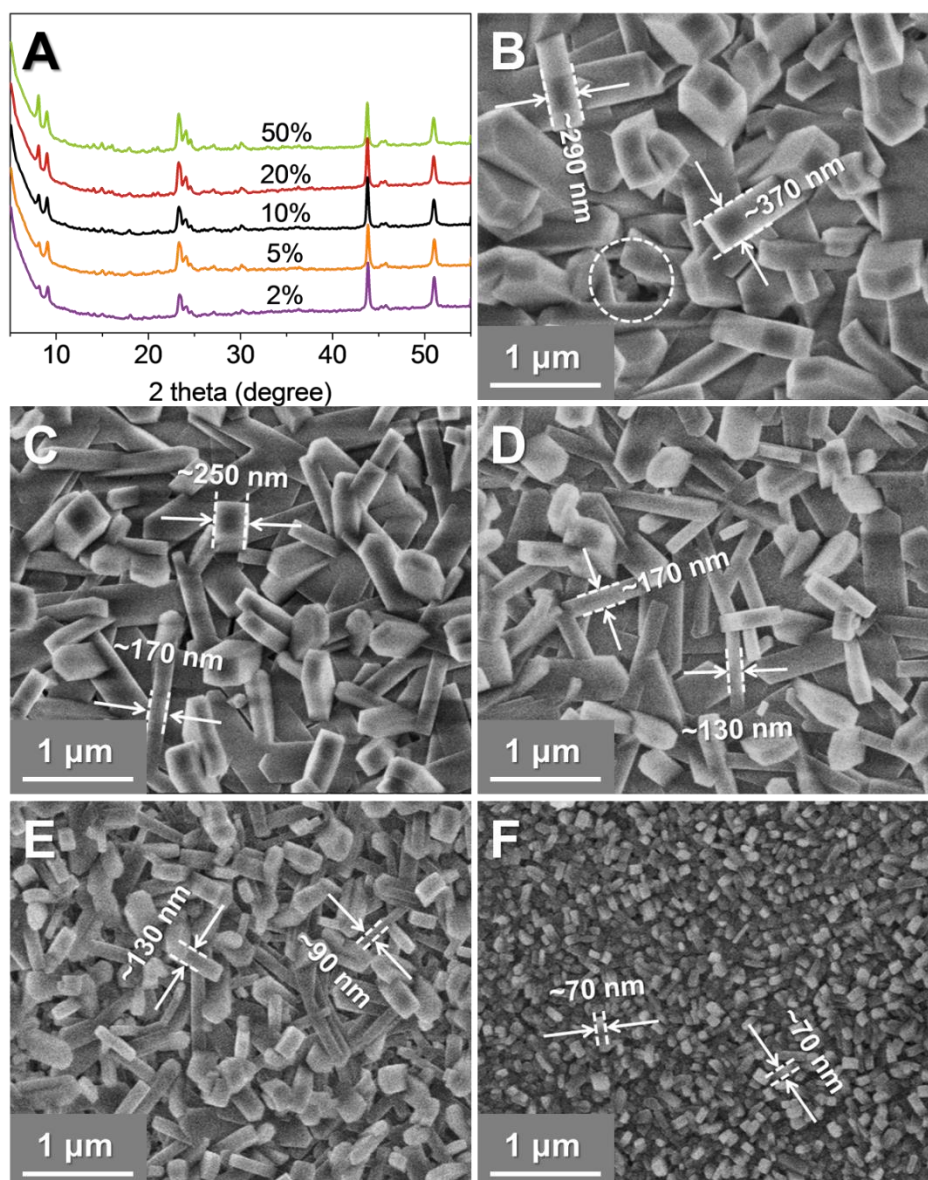

**Fig. S7** XRD patterns (A) and SEM images (B-F) of sample EDA-200-y/72 with varied seeding gel amounts from 2% to 50%, (B)  $y = 2$ , (C)  $y = 5$ , (D)  $y = 10$ , (E)  $y = 20$ , (F)  $y = 50$ .



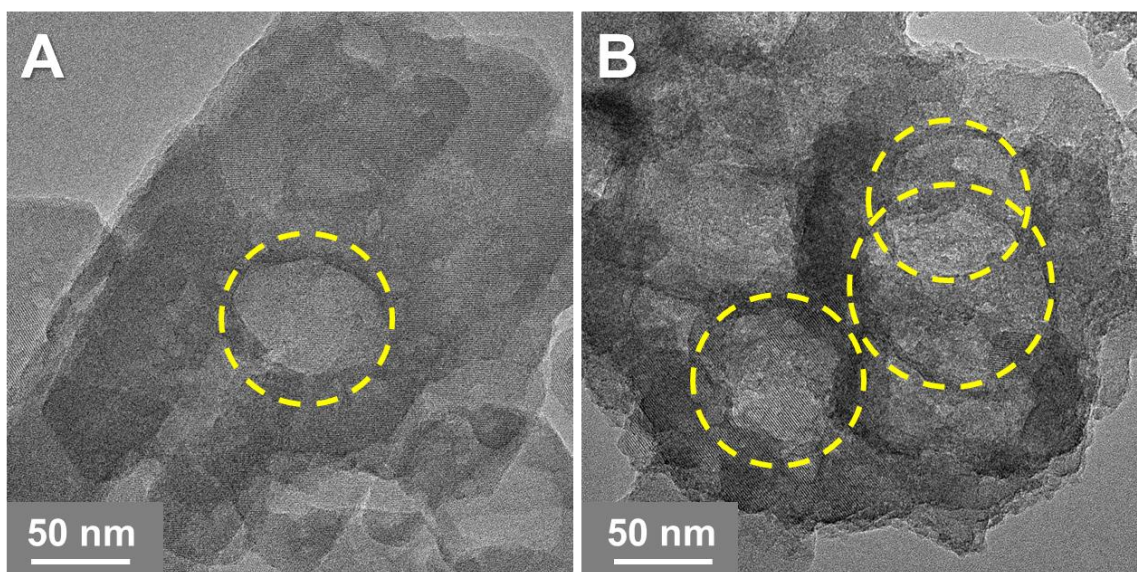

**Fig. S8** TEM images of sample (A) EDA-200-5/72 and (B) EDA-200-50/72 after alkaline treatment with 0.8 M  $\text{Na}_2\text{CO}_3$  solution at 80 °C for 36 h.

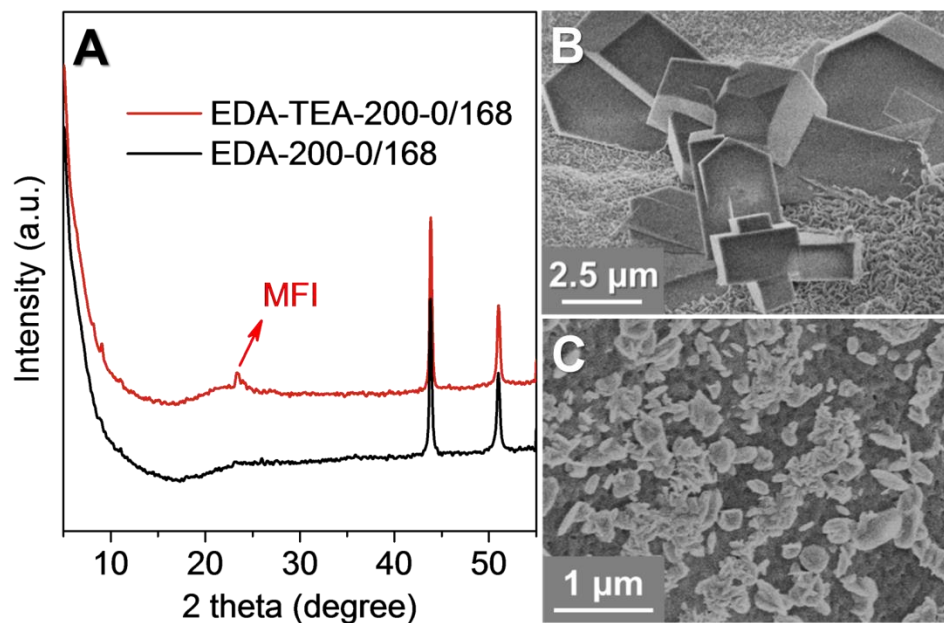

**Fig. S9** XRD patterns (A) and SEM images (B-C) of sample (B) EDA-TEA-200-0/168 and (C) EDA-200-0/168.

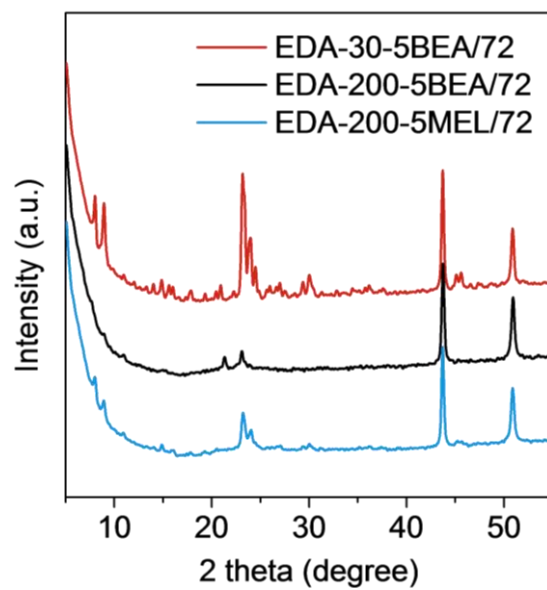

**Fig. S10** XRD patterns of SS-fiber@ZSM-5 composite synthesized with different types of seeding gel and SiO<sub>2</sub>/Al<sub>2</sub>O<sub>3</sub> molar ratios.

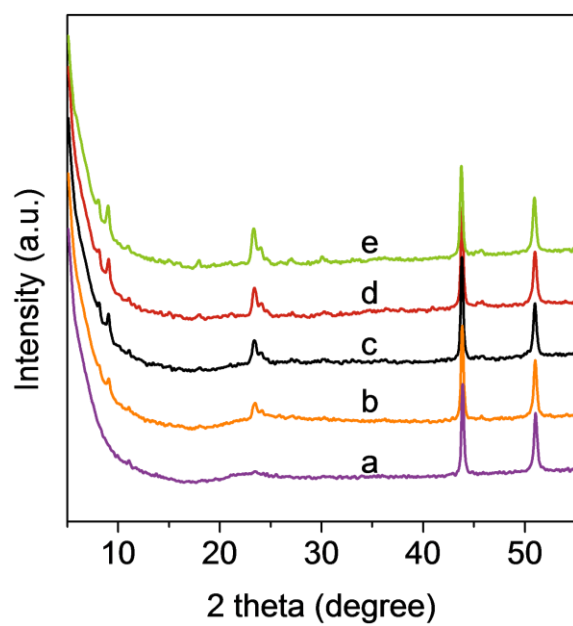

**Fig. S11** XRD patterns of sample EDA-200-5/z obtained after the VPT for (a)  $z = 1$  h, (b)  $z = 2$  h, (c)  $z = 3$  h, (d)  $z = 12$  h, and (e)  $z = 24$  h.

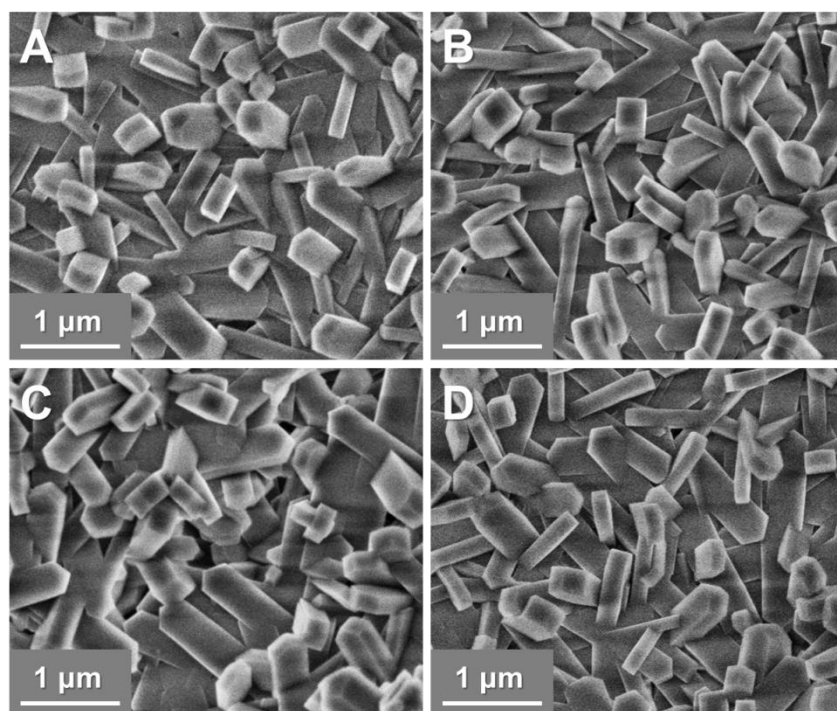

**Fig. S12** SEM images of the sample EDA-200-5/z obtained after the VPT for (A)  $z = 48$  h, (B)  $z = 72$  h, (C)  $z = 120$  h, and (D)  $z = 168$  h.

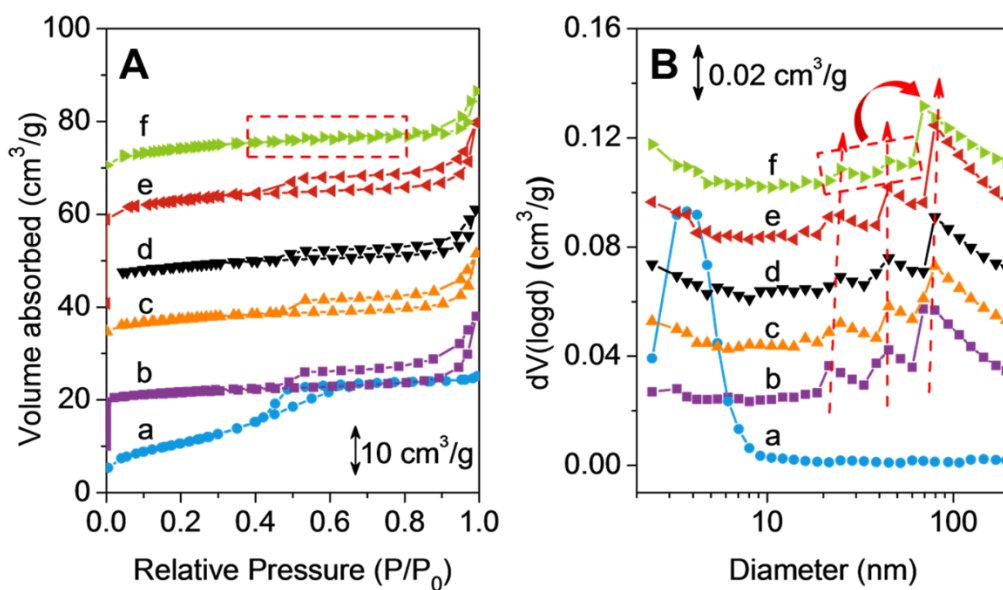

**Fig. S13** N<sub>2</sub> adsorption-desorption isothermals (A) and Barrett-Joyner-Halenda (BJH) mesopore size distribution curves (B) of the sample EDA-200-5/z with zeolite content of ~23.0 wt% obtained after the VPT for (a) z = 24 h, (b) z = 48 h, (c) z = 72 h, (d) z = 120 h, and (e) z = 168 h.



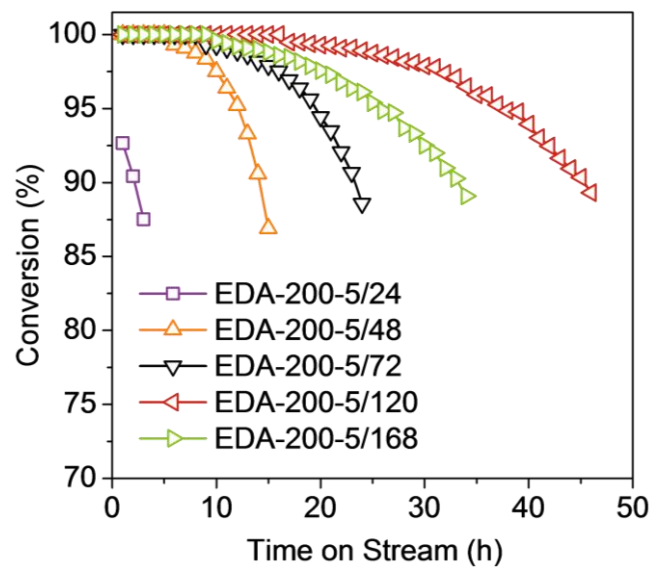

**Fig. S14** Conversion of methanol as a function of time on stream over EDA-200-5/z catalysts. Reaction conditions: 450 °C, WHSV of 10 h<sup>-1</sup>, 0.1 MPa, 30 vol% methanol in N<sub>2</sub>, zeolite 0.4 g. Reaction was quitted at ~90 % methanol conversion.

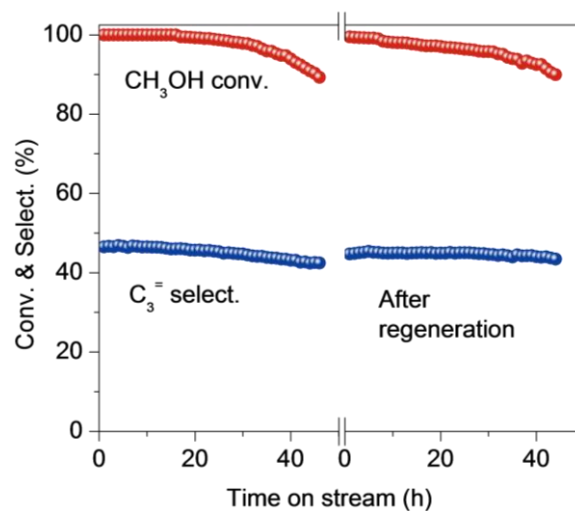

**Fig. S15** Methanol Conversion of and propylene selectivity over EDA-200-5/120 catalyst. Reaction conditions: WHSV = 10 h<sup>-1</sup>, T = 450 °C, P = 1 atm. Regeneration conditions: 550 °C in air for 5 hours.

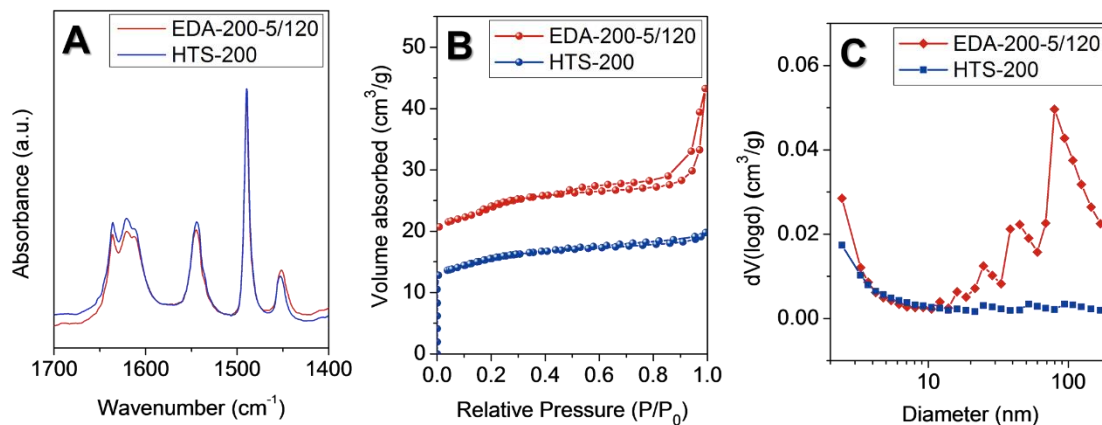

**Fig. S16** (A) pyridine adsorption IR spectra, (B)  $\text{N}_2$  adsorption-desorption isothermals and (C) Barrett-Joyner-Halenda (BJH) mesopore size distribution curves of samples EDA-200-5/120 (~24.4 wt% HZSM-5) and HTS-200 (~16.9 wt% HZSM-5).

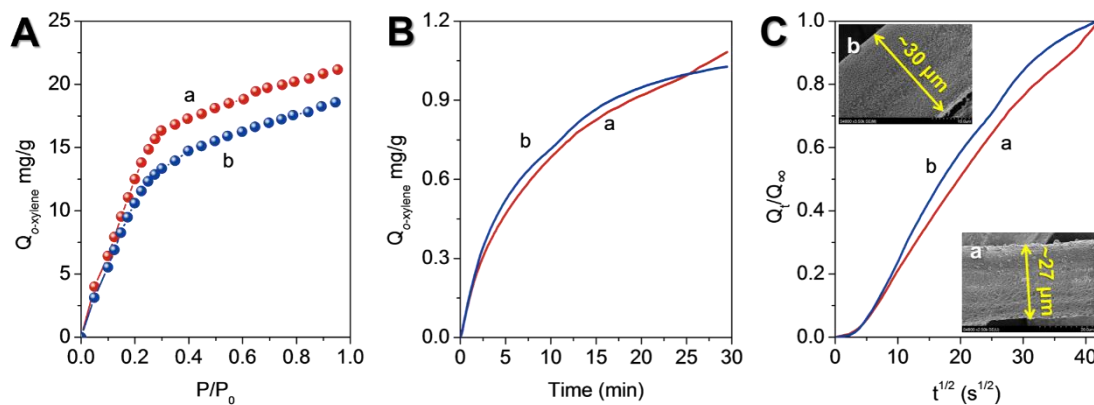

**Fig. S17** (A) The o-xylene adsorption isotherms by IGA at 298 K, (B) the o-xylene adsorption kinetics curves at 298 K and  $P/P_0 = 0.1$  and (C) dependence of normalized o-xylene adsorption on the square root of the adsorption time as well as SEM images for (a) EDA-200-5/120 (~24.4 wt% HZSM-5) and (b) HTS-200 (~16.9 wt% HZSM-5).

## Supplementary Text | Calculation of diffusion coefficients (D)

Fig. S17 shows the results of o-xylene diffusion measurement. The diffusion coefficient was estimated from the time-dependent adsorption uptake by the following equation<sup>S1</sup>:

$$\frac{Q_t}{Q_\infty} = \frac{2}{\sqrt{\pi}} \sqrt{\frac{D}{L^2}} \sqrt{t}$$

where  $Q_t$  and  $Q_\infty$  represent the adsorption uptake of o-xylene at time  $t$  and after reaching equilibration respectively. The  $L$  denotes the average zeolite shell thickness of SS-fiber@HZSM-5, being  $\sim 5.0 \mu\text{m}$  and  $\sim 3.5 \mu\text{m}$  for EDA-200-5/120 and HTS-200, respectively, as estimated as estimated from their SEM images (Fig. S17C). The curve in Fig. S17C was made by plotting the  $Q_t/Q_\infty$  versus the square root of the adsorption time, and the slope of the linear part of the curve ( $Q_t/Q_\infty = 0.3-0.6$ ) was used for estimation of the diffusion coefficient (D)<sup>S2</sup>.

## References

S1. J. Crank, *The Mathematics of Diffusion*, Oxford Press, London, 1975, p. 203.

S2. Y. Li, H. Wang, M. Dong, J. Li, Z. Qin, J. Wang and W. Fan, *Rsc Adv.* 2015, **5**, 66301-66310.
